# Supplementary material
Source: PubMed Central journal article supplement (PMC11468685)
Supplement: ADHM-12-2201784-s003.pdf [file ADHM-12-2201784-s003.pdf]

# ADVANCED HEALTHCARE MATERIALS

## Supporting Information

for *Adv. Healthcare Mater.*, DOI 10.1002/adhm.202201784

New Strategy for Promoting Vascularization in Tumor Spheroids in a Microfluidic Assay

*Zhengpeng Wan, Marie A. Floryan, Mark F. Coughlin, Shun Zhang, Amy X. Zhong, Sarah E. Shelton, Xun Wang, Chenguang Xu\*, David A. Barbie\* and Roger D. Kamm\**

## Supporting Information

## New strategy for promoting vascularization in tumor spheroids in a microfluidic assay

Zhengpeng Wan<sup>#</sup>, Marie A. Floryan<sup>#</sup>, Mark F. Coughlin, Shun Zhang, Amy X. Zhong, Sarah E. Shelton, Xun Wang, Chenguang Xu<sup>\*</sup>, David A. Barbie<sup>\*</sup>, Roger D. Kamm<sup>\*</sup>

# indicates equal contribution of these authors

**Figure S1**

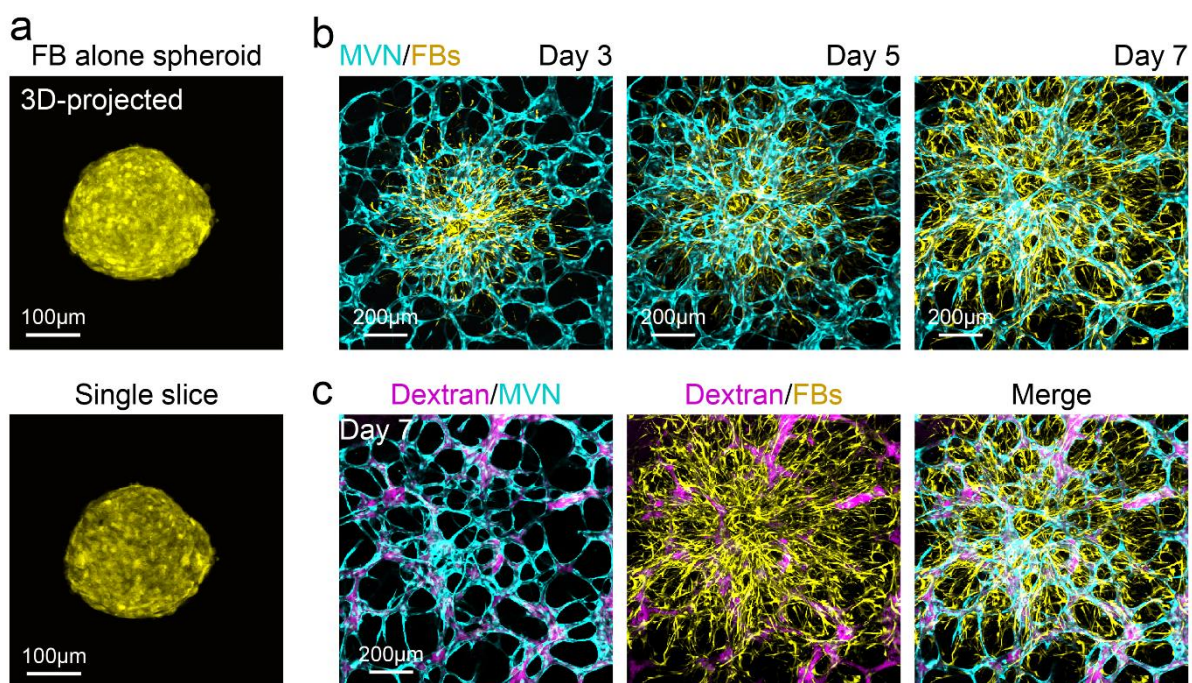

**Figure S1.** Vascularization of FB alone spheroid. a) Representative images of FB alone spheroid. b) Representative confocal images of microvessels in FB alone spheroid on day 3, 5, and 7. c) Images of MVNs perfused with Texas Red Dextran (10 kDa) on day 7.

Figure S2

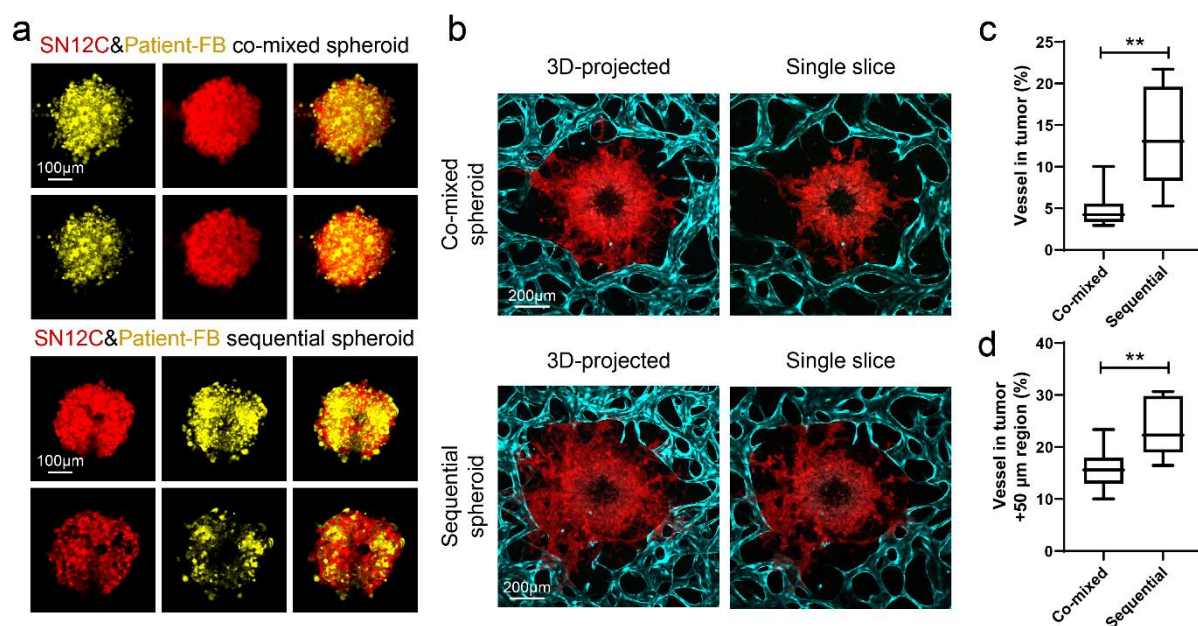

**Figure S2.** Sequential SN12C tumor spheroid made with cancer patient-derived thyroid FBs shows a higher vascularization level than the co-mixed spheroid. a) 3D-projected image and single slice image of SN12C tumor spheroids formed by co-mixed or sequential methods using cancer patient-derived thyroid FBs. b) 3D-projected images and single slice images of vascularized tumor spheroids formed by co-mixed or sequential methods. c) Statistical analysis of vessel percentage in the tumor region or d) tumor +50 µm region. Bars represent mean  $\pm$  S.D. Two-tailed t tests were performed for the statistical comparisons. Data were collected from at least 9 tumor spheroids for each group. \*\*  $p < 0.01$ .

Figure S3

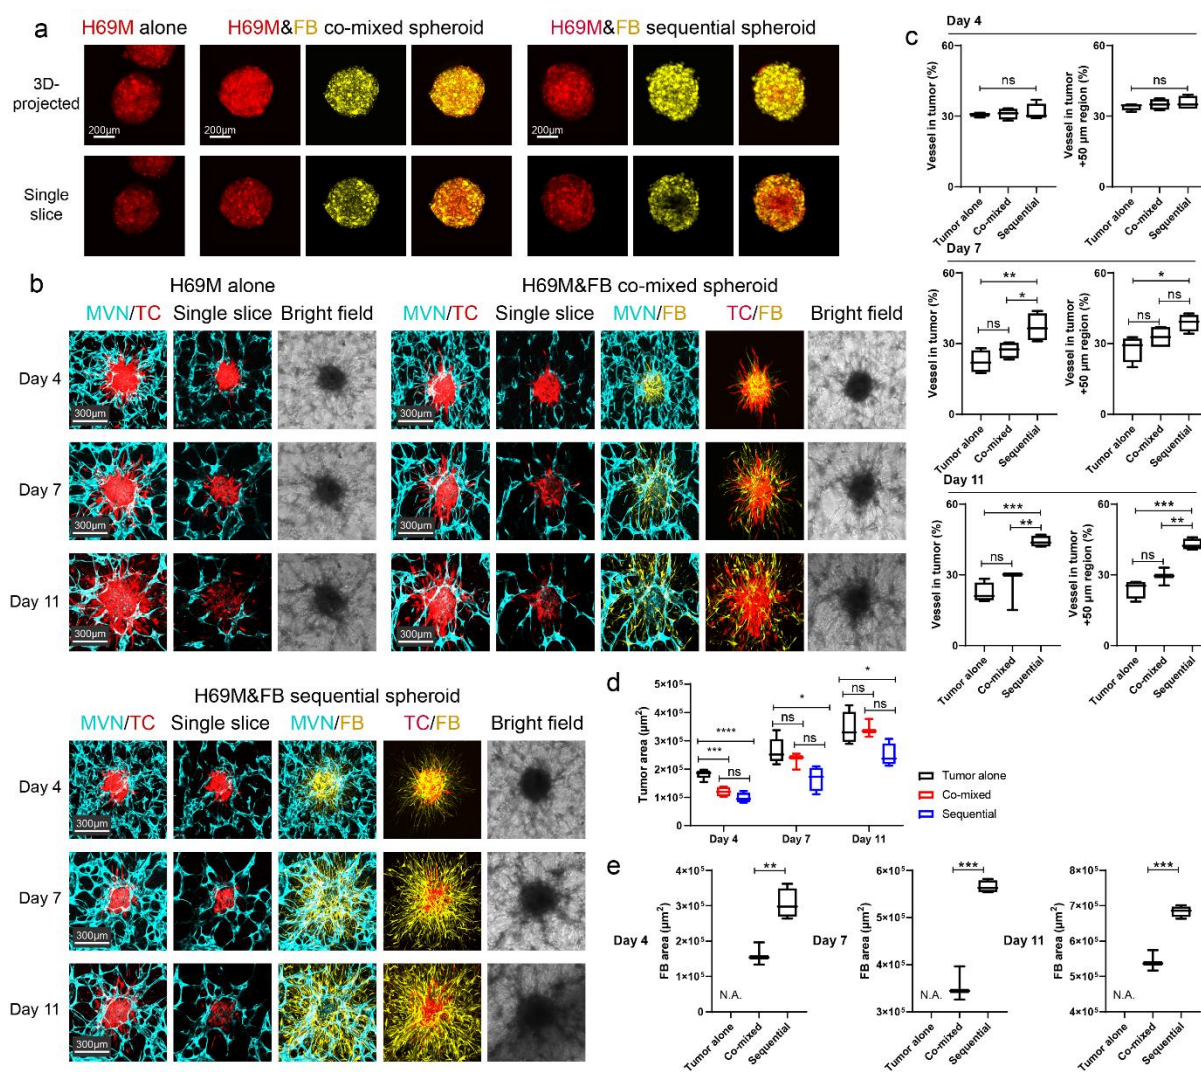

**Figure S3.** H69M tumor spheroids formed by the sequential method promote vascularization.

a) Representative confocal images of H69M tumor spheroids made using the three different methods. b) Representative confocal images of vascularized H69M tumor spheroids formed by three different methods on days 4, 7, and 11. c) Statistical analysis of vessel percentage in the tumor region and tumor +50  $\mu\text{m}$  region on days 4, 7, and 11. d) Statistical analysis of tumor area over 7 days. e) Tumor spheroid associated FB area analysis on day 4, 7, and 11. Bars represent mean  $\pm$  S.D. One-way ANOVA was performed for the statistical comparisons in (c) and (d). In figure (c), day 4, no significant differences; day 7 left  $p < 0.01$ , right  $p < 0.05$ ; day 11, left  $p < 0.001$ , right  $p < 0.001$ . In figure (d), day 4,  $p < 0.0001$ ; day 7,  $p < 0.05$ ; day 11,  $p < 0.05$ . Significance determined by Tukey's multiple comparisons test of mean value between each group. Two-tailed t tests were performed for the statistical comparisons in (e). Data were collected from at least 6 tumor spheroids for each group. \*  $p < 0.05$ , \*\*  $p < 0.01$ , \*\*\*  $p < 0.001$ , \*\*\*\*  $p < 0.0001$ .

Figure S4

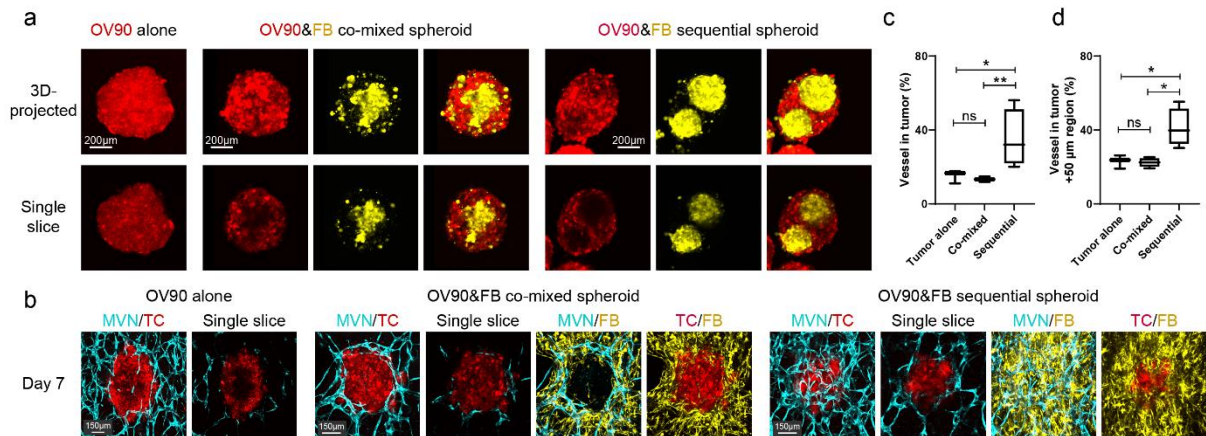

**Figure S4.** Vascularization of OV90 sequential tumor spheroids is superior to the other methods. a) Representative confocal images of OV90 tumor spheroids formed by three different methods. b) Representative confocal images of vascularized OV90 tumor spheroids formed by three different methods. c) Statistical analysis of vessel percentage in the tumor region and d) in tumor +50 μm region. Bars represent mean ± S.D. One-way ANOVA was performed for the statistical comparison. Figure (c),  $p < 0.05$ . Figure (d),  $p < 0.05$ . Significance determined using Tukey’s multiple comparisons test of mean value between each group. Data were collected from at least 5 tumor spheroids for each group. \*  $p < 0.05$ , \*\*  $p < 0.01$ .

**Figure S5**

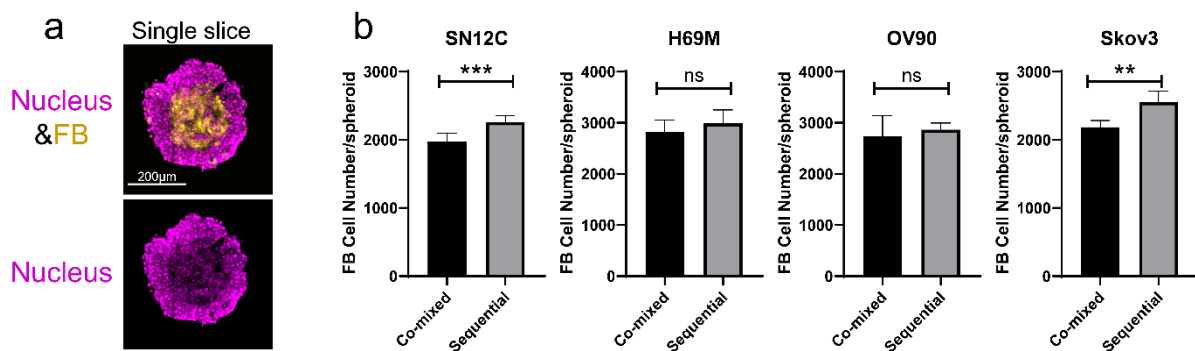

**Figure S5.** FB cell number in tumor spheroids. a) Fluorescent image of OV90 co-mixed tumor spheroid with nuclear staining. b) FB cell numbers in tumor spheroids made with SN12C, H69M, OV90, or Skov3 using co-mixed or sequential methods. Bars represent mean ± S.D. Two-tailed t tests were performed for the statistical comparisons. Data were collected from at least 6 tumor spheroids for each group. \*\*  $p < 0.01$ , \*\*\*  $p < 0.001$ .

**Figure S6**

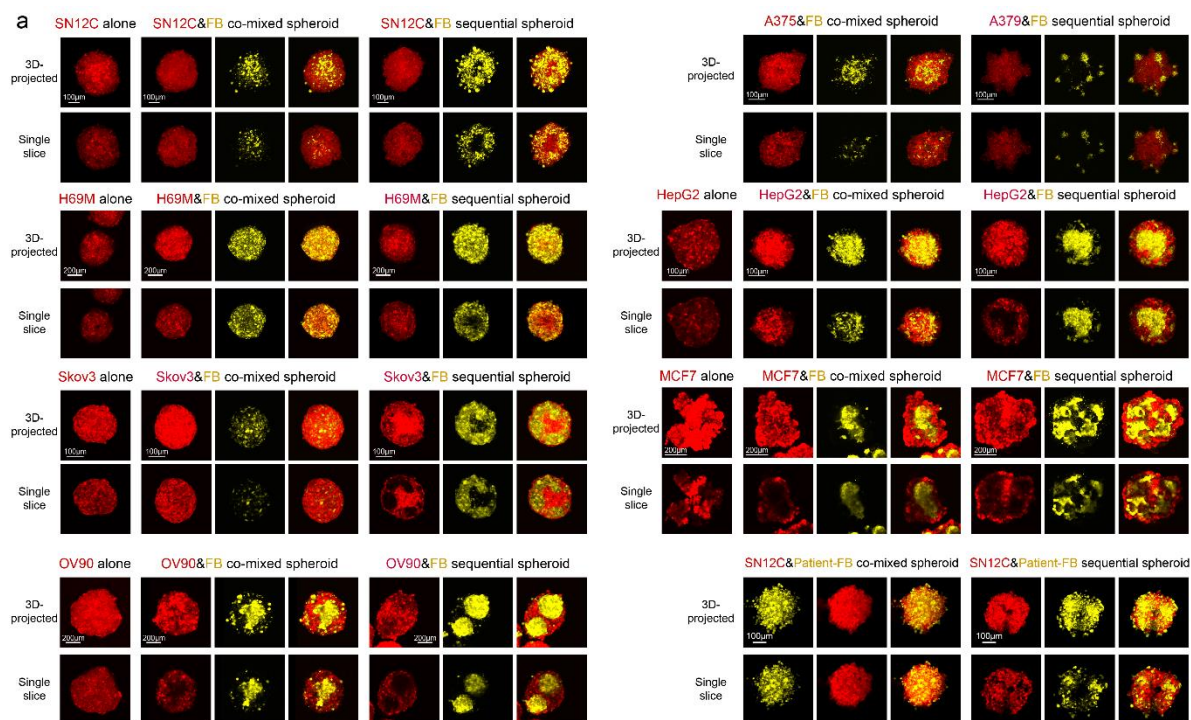

**Figure S6.** Different types of tumor spheroids formed by tumor cell alone, co-mix, and sequential methods. 3D projected and single slice images of tumor spheroids made of SN12C, H69M, Skov3, OV90, A375, HepG2, or MCF7 showed the different patterns of FBs and tumor cells in tumor spheroids.

**Figure S7**

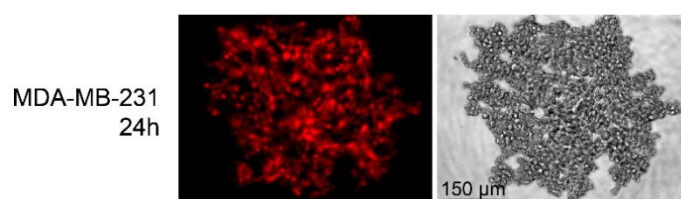

**Figure S7.** MDA-MB-231 cells alone do not form tumor spheroids. Epi-fluorescent and bright field images of MDA-MB-231 cultured in the ULA plate for 24 hours. Tumor cell clusters were weakly connected and easily dissociated by pipetting (not shown).

**Figure S8**

1. Prepare images for analysis

Image > Stacks > Z Project...  
Choose Max Intensity

Change images to 8-bit  
Image > Type > 8-bit

2. Threshold tumor image

Image > Adjust > Threshold...

3. Create ROIs of tumor spheroid

Analyze > Analyze Particles...

Tumor area ROI added

4. Generate ROI with 50 μm larger

Edit > Selection > Enlarge...

Add to ROI manager

5. Threshold Vessel image

6. Remove vessels out of tumor+50 μm region

Click on the +50 μm ROI in ROI manager

Edit > Selection > Make Inverse

Edit > cut

7. Measure the non-Vessel area

Edit > Selection > Create Selection

Analyze > Measure

1. This is the area of the non-vessel (dark) regions

8. Measure area of the entire image

Make sure no ROIs selected

Analyze > Measure

1. This is the area of the non-vessel (dark) regions  
2. This is the area for entire image

The difference between area 2 and area 1 is the area of vessel in the tumor and nearby 50 μm region.

Vessel area in tumor and nearby 50 μm region = Area 2 (719755.4) - Area 1 (649016.5) = 70738.9 μm<sup>2</sup>

9. Similarly remove vessels out of tumor ROI

Click on the tumor ROI in ROI manager

Edit > Selection > Make Inverse

Edit > cut

10. Measure the non-Vessel area

Edit > Selection > Create Selection

Analyze > Measure

1. This is the area of the non-vessel (dark) regions  
2. This is the area for entire image  
3. This is the area of the non-vessel (dark) regions (exclude from tumor)

The difference between area 2 and area 3 is the area of vessel in the tumor region.

Vessel area in tumor = Area 2 (719755.4) - Area 3 (649016.5) = 41173.75 μm<sup>2</sup>

11. Measure tumor region and tumor + 50 μm region

Click on the +50 μm region ROI in ROI manager

Analyze > Measure

Area 4 is the area of tumor + 50 μm region

Click on the tumor ROI in ROI manager

Analyze > Measure

Area 5 is the area of tumor region

12. Use excel to calculate Vessel in tumor or/and nearby 50 μm region percentage

| Original data |          | Calculated |                                                |
|---------------|----------|------------|------------------------------------------------|
| 1             | 649016.5 | 4208       | Tumor area                                     |
| 2             | 719755.4 | 269688.6   | Tumor area plus 50 μm                          |
| 3             | 649016.5 | 41173.75   | Vessel area in tumor                           |
| 4             | 269688.6 | 269688.6   | Vessel area in tumor and nearby 50 μm region   |
| 5             | 168376.9 | 2645332%   | Vessel in tumor area %                         |
|               |          | 2645332%   | Vessel area in tumor and nearby 50 μm region % |

Vessel in tumor area % = 100 x Vessel area in tumor (41173.75) / tumor area (168376.9) = 2445332%

Vessel in tumor area and nearby 50 μm region % = 100 x Vessel area in tumor and nearby 50 μm region (269688.6) / tumor area plus 50 μm region (70738.9) = 2622984%

**Figure S8.** Vessel percentage in the tumor region and nearby 50  $\mu\text{m}$  region analysis using ImageJ.
